# Supplementary material
Source: PubMed Central journal article supplement (PMC6191331)
Supplement: NIHMS1505805-supplement-1.pdf [file NIHMS1505805-supplement-1.pdf]

## Supplementary Figure 1

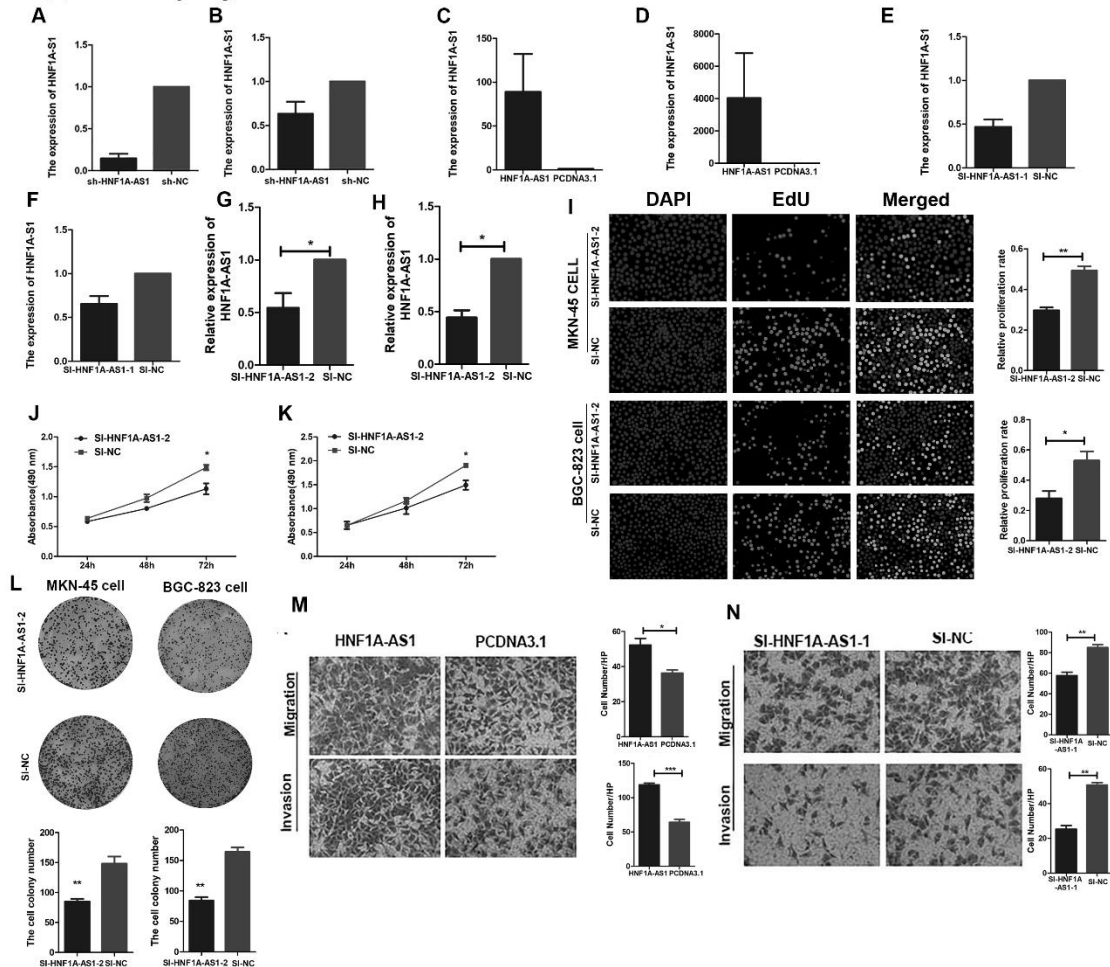

## Supplementary Figure 1

(A-B). The stably knockdown efficiency of HNF1A-AS1 in MKN-45 cells(A) and BGC-823 cells(B).

(C-D). The overexpression efficiency of HNF1A-AS1 in MKN-45 cells and BGC-823 cells.

(E-F). The knockdown efficiency of SI-HNF1A-AS1-1 in MKN-45 cells and BGC-823 cells.

(G-H). The knockdown efficiency of SI-HNF1A-AS1-2 in MKN-45 cells and BGC-823 cells.

(I). Cell proliferation was evaluated 48 h after transfection with SI-HNF1A-AS1-2 or NC using EdU-incorporation assays.

(J-K). Growth curves of MKN-45 and BGC-823 cells after transfection with SI-HNF1A-AS1-2 or NC were determined by MTS assays.

(L). Colony formation assays were performed to detect the effect of SI-HNF1A-AS1-

2 on the anchorage-independent growth of MKN-45 and BGC-823 cells.

(M-N). The effect of HNF1A-AS1 upregulation and downregulation on the migration and invasion of MKN-45 cells was evaluated using Transwell assays.

Three independent experiments were performed, and data are shown as mean  $\pm$  SD.

\* $P < 0.05$ , \*\*  $P < 0.01$ , \*\*\*  $P < 0.001$ .

### Supplementary Figure 2

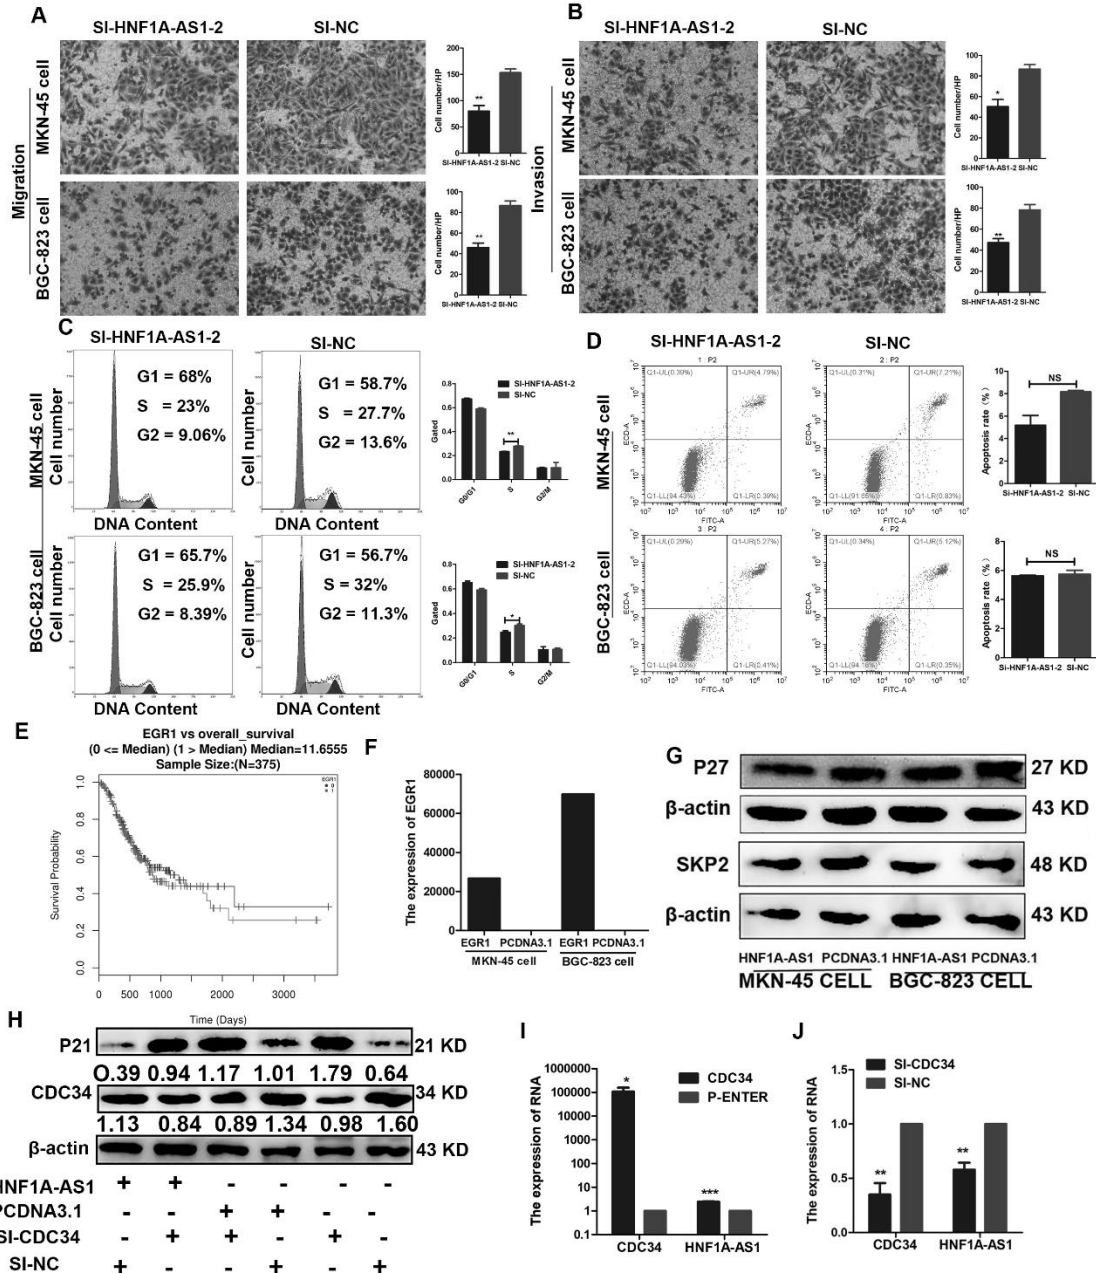

### Supplementary Figure 2

(A-B). The effect of HNF1A-AS1 downregulation on the migration and invasion of

MKN-45 and BGC-823 cells was evaluated using Transwell assays.

(C). The cell cycle distribution after transfection with SI-HNF1A-AS1-2 or NC was determined by PI staining and flow cytometer analysis in MKN-45 and BGC-823 cells.

(D). The effect of HNF1A-AS1 knockdown on apoptosis in MKN-45 and BGC-823 cells was detected by measuring the percentage of Annexin V-stained cells using flow cytometry.

(E). LinkedOmics database indicated that enhanced EGR1 expression predicted poor patient prognosis.

(F). The overexpression efficiency of EGR1 in MKN-45 cells and BGC-823 cells.

(G). The expressions of P27 and SKP2 were not remarkably altered in HNF1A-AS1 overexpression group when compared with control group.

(H). Western blotting analysis of the p21 in MKN-45 cells overexpressing HNF1A-AS1 or control cells with or without transient transfection with CDC34 siRNA.

(I-J). RT-qPCR assay was performed to detect HNF1A-AS1 expression in CDC34 up- or down-regulating MKN-45 cells.

Three independent experiments were performed, and data are shown as mean  $\pm$  SD.

\*P < 0.05, \*\* P < 0.01, \*\*\* P < 0.001.

### Supplementary Table 1. Sequences of primers.

| Name                       | Sense primer (5'- to 3')        | Antisense primer (5'- to 3')   |
|----------------------------|---------------------------------|--------------------------------|
| <b>Primers for cloning</b> |                                 |                                |
| -2000/0                    | GGGGTACCGTAAGCCCTTTGTGAACTCCA   | GTAGCTAGCCGCCCCAAGCTTGCAAGGA   |
| -1014/0                    | GGGGTACCGCCTCAGACAATCCCAGTCAC   | GTAGCTAGCCGCCCCAAGCTTGCAAGGA   |
| -503/0                     | GGGGTACCAGGAACAGACTTTCCCAAGGTCA | GTAGCTAGCCGCCCCAAGCTTGCAAGGA   |
| -285/0                     | GG GGTACC CCAGGCCTCAATAGGGGTC   | GTAGCTAGCCGCCCCAAGCTTGCAAGGA   |
| -234/0                     | CC GGTACC ACCCTGACGCTGGAGGCCCA  | GTAGCTAGCCGCCCCAAGCTTGCAAGGA   |
| -187/0                     | CC GGTACC TCCCTTTTGTACCTGAACAAT | GTAGCTAGCCGCCCCAAGCTTGCAAGGA   |
| ELK1                       | CACAAGCTTCACTCCCCAGCGATGGAC     | CGCTCTAGATGGTAGTAGTCATGGCTTCTG |
| KLF5                       | CAGAAGCTTATGGCTACAAGGGTGCTGA    | GCGGAATTCTCAGTTCTGGTGCCTCTTC   |

|             |                               |                                   |
|-------------|-------------------------------|-----------------------------------|
| EGR1        | CCCAAGCTTAGCTCTCCAGCCTGCGCTG  | CACTCTAGATTTCCCCTTTCCCTTTAGCAA    |
| CDC34-3'UTR | CTAGCTAGCCACCACCAGAATAAACTTGC | CCGCTCGAGTTCTCATAAAGTAGTTTTATTAGA |

**Primers for**

**ChIP**

|    |                      |                        |
|----|----------------------|------------------------|
| H1 | GACCCAGGACCCACCCCGGC | GAGAGGGGCGGGGACCCCT    |
| H2 | CCCTCTCTCCCTGGCTCCTT | TCAACCAGTCCTTGTTCCCTGC |
| H3 | CTGCCTCTGTACCGTCTTCC | AAAGGGATCGGAAAACGCC    |

**Primers for**

**qPCR**

|             |                       |                      |
|-------------|-----------------------|----------------------|
| HNF1A-AS1   | AATCTCTGCTGTCTCTTTC   | AGGGCTCATCCTAACACTTT |
| CDC34-3'UTR | GGGCCGTTTCCTGACTACTAC | TGAATCCGTCCACTCTGTGC |

---
